# Supplementary material
Source: PubMed Central journal article supplement (PMC1560082)
Supplement: rspb20053367s04.pdf [file rspb20053367s04.pdf]

**Appendix 1. Bat Mating System & Brain Size Database.**

Note: Body Mass1 represents values reported from the brain mass source and Body Mass2 represents values reported from the testes mass source. For sources see Methods.

| Family           | MSW Binomial                | Total Brain Mass (mg) | Body Mass1 (g) | NeoCortex Volume (mm <sup>3</sup> ) | Testes Mass (g) | Body Mass2 (g) | Roosting Association | Female Promiscuity | Mating System | Echolocation | Diet |
|------------------|-----------------------------|-----------------------|----------------|-------------------------------------|-----------------|----------------|----------------------|--------------------|---------------|--------------|------|
| Craseonycteridae | Craseonycteris thonglongyai | 87                    | 2.56           | 17.5                                |                 |                |                      |                    |               |              | 1 2  |
| Emballonuridae   | Coleura afra                | 257                   | 11.5           | 52.5                                | 0.03            | 10             | SM-MF                | No                 | polygyny      |              | 1 2  |
| Emballonuridae   | Cormura brevirostris        | 219                   | 8.2            | 43.2                                |                 |                |                      |                    |               |              | 1 2  |
| Emballonuridae   | Cyttarops alecto            | 175                   | 5.3            | 31.9                                |                 |                |                      |                    |               |              | 1 2  |
| Emballonuridae   | Emballonura monticola       | 166                   | 5.3            | 32.1                                |                 |                |                      |                    |               |              | 1 2  |
| Emballonuridae   | Emballonura raffrayana      | 174                   | 5.9            | 34.5                                |                 |                |                      |                    |               |              | 1 2  |
| Emballonuridae   | Emballonura semicaudata     | 184                   | 7              | 36                                  |                 |                |                      |                    |               |              | 1 2  |
| Emballonuridae   | Mosia nigrescens            | 120                   | 3.7            |                                     |                 |                |                      |                    |               |              | 1 2  |
| Emballonuridae   | Peropteryx macrotis         | 149.5                 | 5              | 28.15                               |                 |                |                      |                    |               |              | 1 2  |
| Emballonuridae   | Rhynchonycteris naso        | 118                   | 3.8            | 22.1                                | 0.017           | 3.8            | MM-MF                | No                 | polygyny      |              | 1 2  |
| Emballonuridae   | Saccolaimus peli            |                       |                |                                     | 0.575           | 100            | SM-SF                | No                 | monogamy      |              | 1 2  |
| Emballonuridae   | Saccolaimus saccolaimus     | 671.5                 | 47.2           | 144.2                               |                 |                |                      |                    |               |              | 1 2  |
| Emballonuridae   | Saccopteryx bilineata       | 228                   | 7.8            | 43.9                                | 0.011           | 7.4            | SM-MF                | No                 | polygyny      |              | 1 2  |
| Emballonuridae   | Saccopteryx canescens       | 130                   | 3.4            | 23.7                                |                 |                |                      |                    |               |              | 1 2  |
| Emballonuridae   | Saccopteryx leptura         | 161                   | 5.1            | 30                                  | 0.025           | 4.1            | SM-SF                | No                 | monogamy      |              | 1 2  |
| Emballonuridae   | Taphozous australis         | 517                   | 24             | 101.8                               |                 |                |                      |                    |               |              | 1 2  |
| Emballonuridae   | Taphozous georgianus        |                       |                |                                     | 0.076           | 30             |                      |                    |               |              | 1 2  |
| Emballonuridae   | Taphozous hildegardae       | 545                   | 27.4           | 111.3                               | 0.138           | 33             |                      |                    |               |              | 1 2  |
| Emballonuridae   | Taphozous longimanus        | 470                   | 23.2           |                                     | 0.077           | 36             |                      |                    |               |              | 1 2  |
| Emballonuridae   | Taphozous mauritianus       | 551                   | 29             | 105.9                               |                 |                |                      |                    | monogamy      |              | 1 2  |
| Emballonuridae   | Taphozous melanopogon       | 536                   | 22.7           | 113.2                               |                 |                |                      |                    |               |              | 1 2  |
| Emballonuridae   | Taphozous theobaldi         | 681                   | 39.8           | 130.6                               |                 |                |                      |                    |               |              | 1 2  |
| Furipteridae     | Furipterus horrens          | 127                   | 3.43           | 23.3                                |                 |                |                      |                    |               |              | 1 2  |
| Megadermatidae   | Cardioderma cor             | 670                   | 26             | 186.3                               | 0.08            | 26             | SM-SF                | No                 | monogamy      |              | 1 2  |
| Megadermatidae   | Lavia frons                 | 644                   | 23.4           | 171.4                               | 0.026           | 23.4           | SM-SF                | No                 | monogamy      |              | 1 2  |
| Megadermatidae   | Macroderma gigas            | 1704                  | 119.8          | 510.5                               | 0.168           | 108            |                      |                    |               |              | 1 2  |
| Megadermatidae   | Megaderma lyra              | 907                   | 38.6           | 244.6                               | 0.155           | 38.6           |                      |                    |               |              | 1 2  |
| Megadermatidae   | Megaderma spasma            | 644                   | 22.6           | 172.9                               | 0.113           | 22.6           |                      |                    |               |              | 1 2  |
| Molossidae       | Chaerephon jobensis         | 360                   | 16.5           | 78.8                                |                 |                |                      |                    |               |              | 1 2  |
| Molossidae       | Chaerephon pumila           | 278.5                 | 13             | 53.25                               | 0.038           | 10.8           | SM-MF                | No                 | polygyny      |              | 1 2  |
| Molossidae       | Cheiromeles torquatus       | 1362                  | 167            | 349.8                               |                 |                |                      |                    |               |              | 1 2  |
| Molossidae       | Eumops auripendulus         | 612                   | 33.8           | 117.8                               |                 |                |                      |                    |               |              | 1 2  |
| Molossidae       | Eumops glaucinus            | 653                   | 36.5           | 129                                 |                 |                |                      |                    |               |              | 1 2  |
| Molossidae       | Eumops perotis              | 802                   | 47.5           |                                     |                 |                |                      |                    |               |              | 1 2  |
| Molossidae       | Molossops abrasus           | 418                   | 33.3           | 80.7                                | 0.185           | 8              |                      |                    |               |              | 1 2  |
| Molossidae       | Molossops greenhalli        | 300                   | 17.5           | 56                                  |                 |                |                      |                    |               |              | 1 2  |
| Molossidae       | Molossops planirostris      | 185                   | 7.25           | 32.2                                |                 |                |                      |                    |               |              | 1 2  |
| Molossidae       | Molossus ater               | 526                   | 33.6           | 113.8                               |                 |                |                      |                    |               |              | 1 2  |
| Molossidae       | Molossus molossus           | 292                   | 13.35          | 62.6                                |                 |                |                      |                    |               |              | 1 2  |
| Molossidae       | Mops condylurus             | 424.5                 | 26.85          | 91.35                               | 0.12            | 40             |                      |                    |               |              | 1 2  |
| Molossidae       | Mops mops                   | 475                   | 30.9           | 105.6                               |                 |                |                      |                    |               |              | 1 2  |
| Molossidae       | Mops niveiventer            | 432                   | 21.7           | 86.9                                |                 |                |                      |                    |               |              | 1 2  |
| Molossidae       | Mormopterus beccarii        | 233                   | 14.2           | 41.4                                |                 |                |                      |                    |               |              | 1 2  |
| Molossidae       | Mormopterus jugularis       | 220                   | 11.5           |                                     |                 |                |                      |                    |               |              | 1 2  |
| Molossidae       | Otomops martiensseni        | 756                   | 41.5           | 153.6                               | 0.17            | 36             | SM-MF                | No                 | polygyny      |              | 1 2  |
| Molossidae       | Tadarida aegyptiaca         | 393                   | 17.7           | 77.3                                | 0.132           | 14.9           |                      |                    |               |              | 1 2  |
| Molossidae       | Tadarida brasiliensis       |                       |                |                                     | 0.091           | 11.1           | MM-MF                | Yes                | polygynandry  |              | 1 2  |
| Mormoopidae      | Mormoops megalophylla       | 386                   | 15.7           | 67.2                                |                 |                |                      |                    |               |              | 1 2  |
| Mormoopidae      | Pteronotus davyi            | 310                   | 10.6           |                                     | 0.174           | 9.2            |                      |                    |               |              | 1 2  |
| Mormoopidae      | Pteronotus gymnonotus       | 343                   | 13.6           | 77.7                                |                 |                |                      |                    |               |              | 1 2  |
| Mormoopidae      | Pteronotus parnellii        | 543                   | 20.2           | 119.8                               |                 |                |                      |                    |               |              | 1 2  |
| Mormoopidae      | Pteronotus personatus       | 228                   | 8.1            | 50                                  |                 |                |                      |                    |               |              | 1 2  |
| Natalidae        | Natalus tumidirostris       | 245                   | 6.9            | 55.1                                |                 |                |                      |                    |               |              | 1 2  |
| Noctilionidae    | Noctilio albiventris        | 597                   | 32.7           | 184.2                               | 0.064           | 31.2           |                      |                    |               |              | 1 2  |
| Noctilionidae    | Noctilio leporinus          | 1183                  | 58             | 361.7                               | 0.177           | 64.8           | SM-MF                | No                 | polygyny      |              | 1 2  |
| Nycteridae       | Nycteris arge               | 347                   | 10.6           | 89.8                                |                 |                | SM-SF                | No                 | monogamy      |              | 1 2  |
| Nycteridae       | Nycteris grandis            | 709                   | 29.8           | 187                                 |                 |                |                      |                    |               |              | 1 2  |
| Nycteridae       | Nycteris hispidus           | 284                   | 7.8            | 69.6                                |                 |                | SM-SF                | No                 | monogamy      |              | 1 2  |
| Nycteridae       | Nycteris javanica           | 470                   | 18.4           | 122.7                               |                 |                |                      |                    |               |              | 1 2  |
| Nycteridae       | Nycteris macrotis           | 388                   | 14.5           | 102.1                               |                 |                |                      |                    |               |              | 1 2  |

|                |                             |       |       |       |       |      |       |    |          |   |   |
|----------------|-----------------------------|-------|-------|-------|-------|------|-------|----|----------|---|---|
| Nycteridae     | Nycteris nana               | 238   | 6.9   | 54.4  |       |      | SM-SF | No | monogamy | 1 | 2 |
| Nycteridae     | Nycteris thebaica           | 323   | 8.9   | 85.7  |       |      |       |    |          | 1 | 2 |
| Nycteridae     | Nycteris tragata            | 460   | 14.4  | 124.1 |       |      |       |    |          | 1 | 2 |
| Phyllostomidae | Ametrida centurio           | 290   | 10.5  |       |       |      |       |    |          | 1 | 1 |
| Phyllostomidae | Anoura caudifera            | 405   | 10.6  | 101.1 |       |      |       |    |          | 1 | 1 |
| Phyllostomidae | Anoura cultrata             |       |       |       | 0.099 | 17.1 |       |    |          | 1 | 1 |
| Phyllostomidae | Anoura geoffroyi            | 586   | 16    | 146.1 | 0.05  | 15.1 |       |    |          | 1 | 1 |
| Phyllostomidae | Ardops nicholli             |       |       | 148.6 | 0.099 | 16.9 |       |    |          | 1 | 1 |
| Phyllostomidae | Artibeus cinereus           | 467   | 12.6  | 120.4 |       |      | SM-MF |    |          | 1 | 1 |
| Phyllostomidae | Artibeus concolor           | 633   | 19.4  | 152.3 |       |      |       |    |          | 1 | 1 |
| Phyllostomidae | Artibeus glaucus            | 476   | 12.2  |       |       |      |       |    |          | 1 | 1 |
| Phyllostomidae | Artibeus hartii             | 511   | 16.1  | 130.3 |       |      |       |    |          | 1 | 1 |
| Phyllostomidae | Artibeus jamaicensis        | 1016  | 41    | 281.1 | 0.051 | 40   | SM-MF |    |          | 1 | 1 |
| Phyllostomidae | Artibeus lituratus          | 1233  | 56    | 326   | 0.229 | 79   |       |    |          | 1 | 1 |
| Phyllostomidae | Artibeus phaeotis           | 448   | 11.8  |       | 0.051 | 12   |       |    |          | 1 | 1 |
| Phyllostomidae | Artibeus toltecus           | 543   | 16.6  |       |       |      |       |    |          | 1 | 1 |
| Phyllostomidae | Brachyphylla cavernarum     | 1196  | 44.5  | 322.9 | 0.064 | 40.1 |       |    |          | 1 | 1 |
| Phyllostomidae | Carollia castanea           | 452   | 13.1  | 104   |       |      |       |    |          | 1 | 1 |
| Phyllostomidae | Carollia perspicillata      | 546   | 17.8  | 129.1 | 0.125 | 18.5 | SM-MF | No | polygyny | 1 | 1 |
| Phyllostomidae | Centurio senex              |       |       |       | 0.08  | 22.9 |       |    |          | 1 | 1 |
| Phyllostomidae | Chiroderma salvini          | 814   | 26.1  | 210.5 |       |      |       |    |          | 1 | 1 |
| Phyllostomidae | Chiroderma trinitatum       | 537   | 13.7  | 152.2 |       |      |       |    |          | 1 | 1 |
| Phyllostomidae | Chiroderma villosum         | 770.5 | 28.25 | 195.1 |       |      |       |    |          | 1 | 1 |
| Phyllostomidae | Choeroniscus minor          | 389   | 9.6   | 95.4  |       |      |       |    |          | 1 | 1 |
| Phyllostomidae | Chrotopterus auritus        |       |       |       | 0.182 | 92.1 | SM-SF | No | monogamy | 1 | 2 |
| Phyllostomidae | Desmodus rotundus           | 999   | 36.3  | 312.5 | 0.083 | 33.7 | SM-MF | No | polygyny | 1 | 2 |
| Phyllostomidae | Diaemus youngi              | 978   | 34.6  |       |       |      |       |    |          | 1 | 2 |
| Phyllostomidae | Diphylla ecaudata           | 798   | 30.9  | 231.1 |       |      |       |    |          | 1 | 2 |
| Phyllostomidae | Ectophylla alba             |       |       |       | 0.079 | 5.5  | SM-MF |    |          | 1 | 1 |
| Phyllostomidae | Glossophaga leachii         |       |       |       | 0.029 | 8.4  |       |    |          | 1 | 1 |
| Phyllostomidae | Glossophaga longirostris    | 435   | 11.3  | 92.9  |       |      |       |    |          | 1 | 1 |
| Phyllostomidae | Glossophaga soricina        | 393   | 9.9   | 88    |       |      |       |    |          | 1 | 1 |
| Phyllostomidae | Leptonycteris curasoae      | 610   | 24.5  | 140.3 | 0.263 | 29   |       |    |          | 1 | 1 |
| Phyllostomidae | Leptonycteris nivalis       | 586   | 22.8  | 144.3 |       |      |       |    |          | 1 | 1 |
| Phyllostomidae | Lionycteris spurrelli       | 352   | 7.55  | 81.7  |       |      |       |    |          | 1 |   |
| Phyllostomidae | Lonchophylla mordax         | 432   | 10.7  | 97.5  |       |      |       |    |          | 1 | 1 |
| Phyllostomidae | Lonchophylla thomasi        | 337   | 6.9   | 76.7  |       |      |       |    |          | 1 | 1 |
| Phyllostomidae | Lonchorhina aurita          | 377   | 18    |       |       |      |       |    |          | 1 | 2 |
| Phyllostomidae | Macrophyllum macrophyllum   | 321   | 8.6   | 80.3  |       |      |       |    |          | 1 | 2 |
| Phyllostomidae | Macrotus waterhousii        |       |       |       | 0.037 | 16   |       |    |          | 1 | 1 |
| Phyllostomidae | Mesophylla macconnelli      | 344   | 7.5   | 86.9  |       |      |       |    |          | 1 | 1 |
| Phyllostomidae | Micronycteris brachyotis    | 408   | 14.7  | 88    |       |      |       |    |          | 1 | 1 |
| Phyllostomidae | Micronycteris megalotis     | 274   | 6.5   | 59.7  |       |      |       |    |          | 1 | 1 |
| Phyllostomidae | Micronycteris minuta        | 286   | 6.9   | 65.6  |       |      |       |    |          | 1 | 1 |
| Phyllostomidae | Micronycteris schmidtorum   | 308   | 7.8   | 76    |       |      |       |    |          | 1 | 1 |
| Phyllostomidae | Mimon crenulatum            | 326   | 11.8  | 87.1  |       |      |       |    |          | 1 | 1 |
| Phyllostomidae | Monophyllus plethodon       | 412.5 | 14.9  | 96.4  | 0.042 | 15.5 |       |    |          | 1 | 1 |
| Phyllostomidae | Phylloderma stenops         | 1338  | 46.1  | 348.3 |       |      |       |    |          | 1 | 1 |
| Phyllostomidae | Phyllostomus discolor       | 1090  | 36.6  | 312.6 | 0.649 | 44.9 | SM-MF | No | polygyny | 1 | 1 |
| Phyllostomidae | Phyllostomus elongatus      | 885   | 44.9  | 226.3 |       |      |       |    |          | 1 | 1 |
| Phyllostomidae | Phyllostomus hastatus       | 1517  | 90.1  | 438.9 | 0.308 | 91.8 | SM-MF | No | polygyny | 1 | 2 |
| Phyllostomidae | Platyrrhinus brachycephalus | 608   | 16.1  | 158.1 |       |      |       |    |          | 1 | 1 |
| Phyllostomidae | Platyrrhinus helleri        | 519   | 13.8  | 147.1 |       |      |       |    |          | 1 | 1 |
| Phyllostomidae | Platyrrhinus infuscus       | 1110  | 50.2  | 284.5 |       |      |       |    |          | 1 | 1 |
| Phyllostomidae | Platyrrhinus lineatus       | 741   | 22.6  | 213.9 |       |      |       |    |          | 1 | 1 |
| Phyllostomidae | Platyrrhinus vittatus       | 1175  | 36.6  | 344.4 |       |      |       |    |          | 1 | 1 |
| Phyllostomidae | Rhinophylla pumilio         | 356   | 8.9   | 85.6  |       |      |       |    |          | 1 | 1 |
| Phyllostomidae | Sphaeronycteris toxophyllum | 524   | 18.4  | 135.2 |       |      |       |    |          | 1 | 1 |
| Phyllostomidae | Sturnira bidens             |       |       |       | 0.058 | 17.5 |       |    |          | 1 | 1 |
| Phyllostomidae | Sturnira lilium             | 618   | 20.2  | 161.4 | 0.121 | 20.4 |       |    |          | 1 | 1 |
| Phyllostomidae | Sturnira ludovici           | 676   | 25.9  | 159.7 |       |      |       |    |          | 1 | 1 |
| Phyllostomidae | Sturnira tildae             | 701   | 24.4  | 190   |       |      |       |    |          | 1 | 1 |
| Phyllostomidae | Tonatia bidens              | 788   | 29.4  | 206.6 |       |      |       |    |          | 1 | 1 |
| Phyllostomidae | Tonatia carrikeri           |       |       |       | 0.409 | 23   |       |    |          | 1 | 1 |

|                |                           |        |       |        |       |       |  |       |     |              |   |   |
|----------------|---------------------------|--------|-------|--------|-------|-------|--|-------|-----|--------------|---|---|
| Phyllostomidae | Tonatia schulzi           | 510    | 21.3  | 153.5  |       |       |  |       |     |              | 1 | 1 |
| Phyllostomidae | Tonatia silvicola         | 756    | 32.3  | 240.2  |       |       |  |       |     |              | 1 | 1 |
| Phyllostomidae | Trachops cirrhosus        | 1003   | 36.9  | 296.4  |       |       |  |       |     |              | 1 | 2 |
| Phyllostomidae | Uroderma bilobatum        | 612    | 16.2  | 155.8  | 0.098 | 14.9  |  | SM-MF |     |              | 1 | 1 |
| Phyllostomidae | Vampyressa pusilla        | 378    | 8.6   | 98.3   |       |       |  |       |     |              | 1 | 1 |
| Phyllostomidae | Vampyrodes caraccioli     | 947    | 39.7  | 248.6  | 0.332 | 26.9  |  |       |     |              | 1 | 1 |
| Phyllostomidae | Vampyrum spectrum         | 2587   | 173   | 757.7  | 0.203 | 158.8 |  | SM-SF | No  | monogamy     | 1 | 2 |
| Pteropodidae   | Acerodon mackloti         |        |       |        | 3.25  | 518   |  |       |     |              | 2 | 1 |
| Pteropodidae   | Balionycteris maculata    | 512    | 14.4  | 135    |       |       |  |       |     |              | 2 | 1 |
| Pteropodidae   | Casinycteris argynnis     | 838    | 27    | 233.7  |       |       |  |       |     |              | 2 | 1 |
| Pteropodidae   | Chironax melanocephalus   | 606    | 17.7  | 168.3  |       |       |  |       |     |              | 2 | 1 |
| Pteropodidae   | Cynopterus brachyotis     | 981    | 33.9  | 287.6  |       |       |  | SM-MF |     |              | 2 | 1 |
| Pteropodidae   | Cynopterus horsfieldi     | 1373   | 59.3  | 432.3  |       |       |  | SM-MF |     |              | 2 | 1 |
| Pteropodidae   | Cynopterus sphinx         | 1061   | 42.4  | 352.2  | 0.36  | 35    |  | SM-MF | Yes | polygynandry | 2 | 1 |
| Pteropodidae   | Dobsonia inermis          | 2700   | 149   | 834.8  |       |       |  |       |     |              | 2 | 1 |
| Pteropodidae   | Dobsonia moluccensis      | 4585.5 | 347.5 | 1513.5 |       |       |  |       |     |              | 2 | 1 |
| Pteropodidae   | Dobsonia peroni           |        |       |        | 1.64  | 224   |  |       |     |              | 2 | 1 |
| Pteropodidae   | Dobsonia praedatrix       | 3028   | 184   | 933    |       |       |  |       |     |              | 2 | 1 |
| Pteropodidae   | Eidolon helvum            | 4290   | 262   | 1406   | 5.5   | 325   |  | MM-MF |     |              | 2 | 1 |
| Pteropodidae   | Eonycteris spelaea        | 1310   | 58.7  | 384    | 0.798 | 60    |  | MM-MF |     |              | 2 | 1 |
| Pteropodidae   | Epomophorus gambianus     | 4330   | 309   |        |       |       |  |       |     |              | 2 | 1 |
| Pteropodidae   | Epomophorus labiatus      | 1586   | 63.9  | 460.8  | 0.9   | 80    |  |       |     |              | 2 | 1 |
| Pteropodidae   | Epomophorus wahlbergi     | 1814   | 74.1  |        |       |       |  | SM-MF |     |              | 2 | 1 |
| Pteropodidae   | Epomops buettikoferi      |        |       |        | 0.299 | 160   |  | SM-MF |     |              | 2 | 1 |
| Pteropodidae   | Epomops franqueti         | 2210   | 120   | 614.8  |       |       |  |       |     |              | 2 | 1 |
| Pteropodidae   | Haplonycteris fischeri    |        |       |        | 0.81  | 18    |  |       |     |              | 2 | 1 |
| Pteropodidae   | Hypsognathus monstrosus   | 3479   | 310   | 1056   | 0.471 | 310   |  | SM-MF |     |              | 2 | 1 |
| Pteropodidae   | Macroglossus minimus      | 561    | 14.6  | 155.7  | 0.287 | 15.9  |  |       |     |              | 2 | 1 |
| Pteropodidae   | Macroglossus sobrinus     | 694    | 21.8  | 186.2  | 0.317 | 23    |  |       |     |              | 2 | 1 |
| Pteropodidae   | Megaerops ecaudatus       | 797    | 24    | 246.8  |       |       |  |       |     |              | 2 | 1 |
| Pteropodidae   | Megaerops niphanae        | 958    | 32.6  |        |       |       |  |       |     |              | 2 | 1 |
| Pteropodidae   | Megaloglossus woermanni   | 679    | 17.9  | 190.1  |       |       |  |       |     |              | 2 | 1 |
| Pteropodidae   | Melonycteris melanops     | 1291   | 47.3  | 414.2  |       |       |  |       |     |              | 2 | 1 |
| Pteropodidae   | Melonycteris woodfordi    | 1017   | 35.4  | 320    |       |       |  |       |     |              | 2 | 1 |
| Pteropodidae   | Micropteropus pusillus    | 826    | 25.1  | 242.9  | 0.23  | 32.5  |  |       |     |              | 2 | 1 |
| Pteropodidae   | Myonycteris torquata      | 1157   | 36.4  | 336.5  |       |       |  |       |     |              | 2 | 1 |
| Pteropodidae   | Notopterus macdonaldi     | 1456   | 70.5  | 419.9  |       |       |  |       |     |              | 2 | 1 |
| Pteropodidae   | Nyctimene albiventer      | 825    | 29.7  | 219.1  |       |       |  |       |     |              | 2 | 1 |
| Pteropodidae   | Nyctimene robinsoni       | 1232   | 47.1  | 335.1  |       |       |  |       |     |              | 2 | 1 |
| Pteropodidae   | Nyctimene vizcaccia       | 988    | 35.4  | 257    |       |       |  |       |     |              | 2 | 1 |
| Pteropodidae   | Paranyctimene raptor      | 731    | 26.1  | 198.3  |       |       |  |       |     |              | 2 | 1 |
| Pteropodidae   | Penthetor lucasi          | 980    | 35    |        |       |       |  |       |     |              | 2 | 1 |
| Pteropodidae   | Pteropus alecto           | 7039   | 595   | 2716   | 5.1   | 800   |  | MM-MF | Yes | polygynandry | 2 | 1 |
| Pteropodidae   | Pteropus conspicillatus   | 8350   | 750   | 3339   |       |       |  |       |     |              | 2 | 1 |
| Pteropodidae   | Pteropus giganteus        |        |       |        | 8.4   | 1021  |  | MM-MF |     |              | 2 | 1 |
| Pteropodidae   | Pteropus hypomelanus      | 5302   | 390   | 1906   |       |       |  | SM-MF |     |              | 2 | 1 |
| Pteropodidae   | Pteropus lylei            | 6129   | 314   | 2386   |       |       |  |       |     |              | 2 | 1 |
| Pteropodidae   | Pteropus macrotis         | 6127   | 366   |        |       |       |  |       |     |              | 2 | 1 |
| Pteropodidae   | Pteropus mahaganus        | 5280   | 465   | 1915   |       |       |  |       |     |              | 2 | 1 |
| Pteropodidae   | Pteropus neohibernicus    | 9114   | 840   | 3676   |       |       |  |       |     |              | 2 | 1 |
| Pteropodidae   | Pteropus poliocephalus    | 7230   | 695   | 2710   | 6.75  | 677   |  | MM-MF | Yes | polygynandry | 2 | 1 |
| Pteropodidae   | Pteropus rufus            | 6900   | 361   |        |       |       |  |       |     |              | 2 | 1 |
| Pteropodidae   | Pteropus samoensis        | 5792   | 310   | 2144   |       |       |  | SM-SF | No  | monogamy     | 2 | 1 |
| Pteropodidae   | Pteropus scapulatus       | 5360   | 375   | 2078   | 5.3   | 400   |  | MM-MF | Yes | polygynandry | 2 | 1 |
| Pteropodidae   | Pteropus temmincki        | 4890   | 250   | 1814   |       |       |  |       |     |              | 2 | 1 |
| Pteropodidae   | Pteropus tonganus         | 6082   | 436   | 2237   | 3.8   | 850   |  | SM-MF |     |              | 2 | 1 |
| Pteropodidae   | Pteropus vampyrus         | 9121   | 1014  | 3610   |       |       |  | SM-MF | Yes | polygynandry | 2 | 1 |
| Pteropodidae   | Rousettus amplexicaudatus | 1352   | 55.4  | 433    | 0.74  | 91.8  |  |       |     |              | 2 | 1 |
| Pteropodidae   | Rousettus angolensis      | 1774   | 84.3  |        |       |       |  |       |     |              | 2 | 1 |
| Pteropodidae   | Rousettus egyptiacus      | 2276   | 136   | 687.4  | 3.5   | 142   |  |       |     |              | 2 | 1 |
| Pteropodidae   | Scotonycteris zenkeri     | 710    | 21.3  | 182.5  |       |       |  |       |     |              | 2 | 1 |
| Pteropodidae   | Sphaerias blanfordi       | 832    | 29.5  | 223.8  |       |       |  |       |     |              | 2 | 1 |
| Pteropodidae   | Syconycteris australis    | 598.5  | 16.1  | 175.1  |       |       |  |       |     |              | 2 | 1 |
| Rhinolophidae  | Asellia tridens           | 240    | 12.8  |        |       |       |  |       |     |              | 1 | 2 |

|                  |                              |        |       |        |       |      |       |    |          |  |   |   |
|------------------|------------------------------|--------|-------|--------|-------|------|-------|----|----------|--|---|---|
| Rhinolophidae    | Aselliscus stoliczkanus      | 150    | 4.9   | 22.5   |       |      |       |    |          |  | 1 | 2 |
| Rhinolophidae    | Aselliscus tricuspidatus     | 134    | 4.4   | 22.2   |       |      |       |    |          |  | 1 | 2 |
| Rhinolophidae    | Hipposideros armiger         | 800    | 56    | 168.5  |       |      |       |    |          |  | 1 | 2 |
| Rhinolophidae    | Hipposideros ater            | 206.75 | 5.95  | 35.1   |       |      |       |    |          |  | 1 | 2 |
| Rhinolophidae    | Hipposideros bicolor         | 245    | 8.3   |        |       |      |       |    |          |  | 1 | 2 |
| Rhinolophidae    | Hipposideros caffer          | 304.5  | 10.7  | 60.9   |       |      |       |    |          |  | 1 | 2 |
| Rhinolophidae    | Hipposideros calcaratus      | 369    | 11.35 | 77.35  |       |      |       |    |          |  | 1 | 2 |
| Rhinolophidae    | Hipposideros cervinus        | 214    | 7.3   | 40.7   |       |      |       |    |          |  | 1 | 2 |
| Rhinolophidae    | Hipposideros commersoni      | 750    | 101.9 | 171.7  |       |      |       |    |          |  | 1 | 2 |
| Rhinolophidae    | Hipposideros diadema         | 713    | 42.8  | 154.5  |       |      |       |    |          |  | 1 | 2 |
| Rhinolophidae    | Hipposideros fulvus          | 236    | 7     | 44.6   |       |      |       |    |          |  | 1 | 2 |
| Rhinolophidae    | Hipposideros galeritus       | 278    | 10.4  |        | 0.06  | 6.5  | SM-SF | No | monogamy |  | 1 | 2 |
| Rhinolophidae    | Hipposideros halophyllus     | 152    | 4     | 25.5   |       |      |       |    |          |  | 1 | 2 |
| Rhinolophidae    | Hipposideros lankadiva       | 733    | 48.5  | 154.5  |       |      |       |    |          |  | 1 | 2 |
| Rhinolophidae    | Hipposideros larvatus        | 413    | 20.5  | 85.4   |       |      |       |    |          |  | 1 | 2 |
| Rhinolophidae    | Hipposideros lekaguli        | 584    | 30.3  | 123.1  |       |      |       |    |          |  | 1 | 2 |
| Rhinolophidae    | Hipposideros maggietaaylorae | 542.5  | 20.5  | 117.75 |       |      |       |    |          |  | 1 | 2 |
| Rhinolophidae    | Hipposideros pomona          | 233    | 6.2   |        |       |      |       |    |          |  | 1 | 2 |
| Rhinolophidae    | Hipposideros ridleyi         | 268    | 9.6   | 50.3   |       |      |       |    |          |  | 1 | 2 |
| Rhinolophidae    | Hipposideros ruber           | 265    | 7.3   |        |       |      |       |    |          |  | 1 | 2 |
| Rhinolophidae    | Hipposideros speoris         | 284    | 11.5  | 57.6   | 0.08  | 10   |       |    |          |  | 1 | 2 |
| Rhinolophidae    | Hipposideros turpis          | 599    | 34.8  | 128.9  |       |      |       |    |          |  | 1 | 2 |
| Rhinolophidae    | Rhinolophus acuminatus       | 302    | 12.1  |        |       |      |       |    |          |  | 1 | 2 |
| Rhinolophidae    | Rhinolophus affinis          | 355    | 13.7  |        |       |      |       |    |          |  | 1 | 2 |
| Rhinolophidae    | Rhinolophus capensis         | 256    | 12.8  |        |       |      |       |    |          |  | 1 | 2 |
| Rhinolophidae    | Rhinolophus clivus           | 242    | 20.1  |        | 0.354 | 16.2 |       |    |          |  | 1 | 2 |
| Rhinolophidae    | Rhinolophus coelophyllus     | 259    | 7.7   |        |       |      |       |    |          |  | 1 | 2 |
| Rhinolophidae    | Rhinolophus cornutus         | 194    | 6.6   | 37.5   |       |      |       |    |          |  | 1 | 2 |
| Rhinolophidae    | Rhinolophus eloquens         | 404    | 19.1  | 76.5   |       |      |       |    |          |  | 1 | 2 |
| Rhinolophidae    | Rhinolophus ferrumequinum    | 350    | 23.5  |        |       |      | SM-MF |    |          |  | 1 | 2 |
| Rhinolophidae    | Rhinolophus hildebrandti     | 630    | 29.1  |        |       |      |       |    |          |  | 1 | 2 |
| Rhinolophidae    | Rhinolophus hipposideros     | 149    | 4.6   | 19     | 0.038 | 7    |       |    |          |  | 1 | 2 |
| Rhinolophidae    | Rhinolophus landeri          | 277    | 9.7   | 50.6   |       |      |       |    |          |  | 1 | 2 |
| Rhinolophidae    | Rhinolophus lepidus          | 187.5  | 5.7   | 32.6   |       |      |       |    |          |  | 1 | 2 |
| Rhinolophidae    | Rhinolophus luctus           | 621    | 32.8  | 135.6  |       |      | SM-SF | No | monogamy |  | 1 | 2 |
| Rhinolophidae    | Rhinolophus macrotis         | 208    | 6.3   | 32.4   |       |      |       |    |          |  | 1 | 2 |
| Rhinolophidae    | Rhinolophus malayanus        | 202    | 6.4   | 34.5   |       |      |       |    |          |  | 1 | 2 |
| Rhinolophidae    | Rhinolophus megaphyllus      | 245.5  | 8.4   | 47     |       |      |       |    |          |  | 1 | 2 |
| Rhinolophidae    | Rhinolophus mehelyi          | 310    | 9.7   |        |       |      |       |    |          |  | 1 | 2 |
| Rhinolophidae    | Rhinolophus paradoxolophus   | 267    | 9.3   | 46.9   |       |      |       |    |          |  | 1 | 2 |
| Rhinolophidae    | Rhinolophus pearsonii        | 332    | 13.9  | 70.9   |       |      |       |    |          |  | 1 | 2 |
| Rhinolophidae    | Rhinolophus pusillus         | 164    | 4.7   | 29.6   |       |      |       |    |          |  | 1 | 2 |
| Rhinolophidae    | Rhinolophus robinsoni        | 277    | 8.4   |        |       |      |       |    |          |  | 1 | 2 |
| Rhinolophidae    | Rhinolophus stheno           | 264.5  | 7.75  |        |       |      |       |    |          |  | 1 | 2 |
| Rhinolophidae    | Rhinolophus thomasi          | 233    | 9     |        |       |      |       |    |          |  | 1 | 2 |
| Rhinolophidae    | Rhinolophus trifoliatus      | 352    | 14.6  | 71.6   |       |      |       |    |          |  | 1 | 2 |
| Rhinolophidae    | Rhinolophus yunanensis       | 439    | 23.5  | 90.6   |       |      |       |    |          |  | 1 | 2 |
| Rhinolophidae    | Rhinonictis aurantia         | 248    | 8.6   | 47.3   | 0.012 | 9.8  |       |    |          |  | 1 | 2 |
| Rhinolophidae    | Triaeonops persicus          | 271    | 13.7  | 48.1   |       |      |       |    |          |  | 1 | 2 |
| Rhinopomatidae   | Rhinopoma hardwickei         | 275    | 12.9  | 54     | 0.251 | 19   |       |    |          |  | 1 | 2 |
| Rhinopomatidae   | Rhinopoma microphyllum       | 387    | 29.4  | 77.5   | 1.255 | 31   |       |    |          |  | 1 | 2 |
| Thyropteridae    | Thyroptera tricolor          | 230    | 4.5   |        |       |      |       |    |          |  | 1 | 2 |
| Vespertilionidae | Antrozous pallidus           |        |       |        | 0.362 | 23   |       |    |          |  | 1 | 2 |
| Vespertilionidae | Barbastella barbastellus     | 183    | 5.8   |        |       |      |       |    |          |  | 1 | 2 |
| Vespertilionidae | Chalinolobus beatrix         | 144    | 5.5   | 22.9   |       |      |       |    |          |  | 1 | 2 |
| Vespertilionidae | Chalinolobus gouldii         | 240    | 11.7  | 37.3   | 0.029 | 14   |       |    |          |  | 1 | 2 |
| Vespertilionidae | Chalinolobus morio           | 184    | 8.3   | 28.1   |       |      |       |    |          |  | 1 | 2 |
| Vespertilionidae | Chalinolobus poensis         | 205    | 8.6   | 36     |       |      |       |    |          |  | 1 | 2 |
| Vespertilionidae | Eptesicus brasiliensis       | 197.5  | 9     | 32.9   |       |      |       |    |          |  | 1 | 2 |
| Vespertilionidae | Eptesicus demissus           | 231    | 15    |        |       |      |       |    |          |  | 1 | 2 |
| Vespertilionidae | Eptesicus flavescens         | 190    | 10.5  | 31.5   |       |      |       |    |          |  | 1 | 2 |
| Vespertilionidae | Eptesicus furinalis          | 189    | 7.6   |        | 0.154 | 7.5  |       |    |          |  | 1 | 2 |
| Vespertilionidae | Eptesicus fuscus             | 238    | 13.6  | 43.3   |       |      |       |    |          |  | 1 | 2 |
| Vespertilionidae | Eptesicus pachyotis          | 158    | 6.6   |        |       |      |       |    |          |  | 1 | 2 |

|                  |                           |        |        |             |       |      |       |     |              |   |   |
|------------------|---------------------------|--------|--------|-------------|-------|------|-------|-----|--------------|---|---|
| Vespertilionidae | Eptesicus pumilus         | 122    | 5.4    | 18.3        |       |      |       |     |              | 1 | 2 |
| Vespertilionidae | Eptesicus serotinus       | 327    | 22.15  | 55.7        |       |      |       |     |              | 1 | 2 |
| Vespertilionidae | Euderma maculatum         |        |        |             | 0.066 | 15   |       |     |              | 1 | 2 |
| Vespertilionidae | Glischropus tylopus       | 100    | 4.9    | 14.3        |       |      |       |     |              | 1 | 2 |
| Vespertilionidae | Harpiocephalus harpia     | 442    | 13.5   | 81.3        |       |      |       |     |              | 1 | 2 |
| Vespertilionidae | Hesperoptenus blanfordi   | 158    | 7.3    | 25.7        |       |      |       |     |              | 1 | 2 |
| Vespertilionidae | Ia io                     | 761    | 53.3   | 141.3       |       |      |       |     |              | 1 | 2 |
| Vespertilionidae | Kerivoula atrox           | 188    | 4.2    | 45.1        |       |      |       |     |              | 1 | 2 |
| Vespertilionidae | Kerivoula papillosa       | 310    | 10.1   | 69          |       |      | SM-SF | No  | monogamy     | 1 | 2 |
| Vespertilionidae | Kerivoula pellucida       | 203    | 4.1    | 47.2        |       |      |       |     |              | 1 | 2 |
| Vespertilionidae | Kerivoula phalaena        | 116    | 3      | 20.1        |       |      |       |     |              | 1 | 2 |
| Vespertilionidae | Lasiurus borealis         | 170    | 7.8    | 27.9        |       |      |       |     |              | 1 | 2 |
| Vespertilionidae | Lasiurus ega              |        |        |             | 0.025 | 11   |       |     |              | 1 | 2 |
| Vespertilionidae | Lasiurus seminolus        |        |        |             | 0.013 | 9.3  |       |     |              | 1 | 2 |
| Vespertilionidae | Miniopterus australis     | 204    | 7.1    | 37.6        | 0.04  | 7.5  | SM-MF | No  | polygyny     | 1 | 2 |
| Vespertilionidae | Miniopterus fuscus        | 265    | 11.4   | 46.4        |       |      |       |     |              | 1 | 2 |
| Vespertilionidae | Miniopterus inflatus      | 325    | 14.9   | 55.9        |       |      |       |     |              | 1 | 2 |
| Vespertilionidae | Miniopterus magnater      | 324    | 15     | 59.7        |       |      |       |     |              | 1 | 2 |
| Vespertilionidae | Miniopterus minor         |        |        |             | 0.05  | 7.5  | MM-MF | Yes | polygynandry | 1 | 2 |
| Vespertilionidae | Miniopterus pusillus      | 216    | 8.6    | 37.2        |       |      |       |     |              | 1 | 2 |
| Vespertilionidae | Miniopterus schreibersi   | 266.25 | 11.325 | 43.83333333 | 0.08  | 13   |       |     |              | 1 | 2 |
| Vespertilionidae | Miniopterus tristis       | 333    | 15.6   | 62.2        |       |      |       |     |              | 1 | 2 |
| Vespertilionidae | Murina cyclotis           | 265    | 7.875  | 51.55       |       |      |       |     |              | 1 | 2 |
| Vespertilionidae | Murina huttoni            | 258    | 8.8    | 49.5        |       |      |       |     |              | 1 | 2 |
| Vespertilionidae | Murina tubinaris          | 217    | 5.45   | 38          |       |      |       |     |              | 1 | 2 |
| Vespertilionidae | Myotis adversus           | 254    | 11.2   | 46.6        | 0.143 | 10   | SM-MF | Yes | polygynandry | 1 | 2 |
| Vespertilionidae | Myotis albescens          | 126    | 4      | 20.5        | 0.368 | 5.5  | MM-MF | Yes | polygynandry | 1 | 2 |
| Vespertilionidae | Myotis altarium           | 240    | 11     | 36.9        |       |      |       |     |              | 1 | 2 |
| Vespertilionidae | Myotis annectans          | 221    | 9.8    | 37.3        |       |      |       |     |              | 1 | 2 |
| Vespertilionidae | Myotis bechsteini         | 265    | 10     | 36.3        |       |      |       |     |              | 1 | 2 |
| Vespertilionidae | Myotis bocagei            | 190    | 7      | 36          | 0.08  | 8    | SM-MF | No  | polygyny     | 1 | 2 |
| Vespertilionidae | Myotis dasycneme          | 310    | 15     | 46.5        |       |      |       |     |              | 1 | 2 |
| Vespertilionidae | Myotis daubentoni         | 230    | 8.5    |             |       |      |       |     |              | 1 | 2 |
| Vespertilionidae | Myotis evotis             |        |        |             | 0.192 | 6.8  |       |     |              | 1 | 2 |
| Vespertilionidae | Myotis fortidens          | 130    | 4.3    |             |       |      |       |     |              | 1 | 2 |
| Vespertilionidae | Myotis hasseltii          | 188    | 7.5    |             |       |      |       |     |              | 1 | 2 |
| Vespertilionidae | Myotis horsfieldii        | 197    | 6.3    |             |       |      |       |     |              | 1 | 2 |
| Vespertilionidae | Myotis lucifugus          | 169    | 7.9    |             | 0.108 | 6.8  | MM-MF | Yes | polygynandry | 1 | 2 |
| Vespertilionidae | Myotis montivagus         | 170    | 8.3    | 27.8        |       |      |       |     |              | 1 | 2 |
| Vespertilionidae | Myotis muricola           | 124    | 4.8    |             |       |      |       |     |              | 1 | 2 |
| Vespertilionidae | Myotis myotis             | 485    | 25.6   | 78.3        |       |      | SM-MF | Yes | polygynandry | 1 | 2 |
| Vespertilionidae | Myotis mystacinus         | 154    | 5.25   |             |       |      |       |     |              | 1 | 2 |
| Vespertilionidae | Myotis nattereri          | 220    | 7.5    | 34.8        |       |      |       |     |              | 1 | 2 |
| Vespertilionidae | Myotis nigricans          | 146    | 5.6    | 25.65       | 0.026 | 4    | SM-MF | No  | polygyny     | 1 | 2 |
| Vespertilionidae | Myotis riparius           | 173    | 7.95   |             |       |      |       |     |              | 1 | 2 |
| Vespertilionidae | Myotis siligorensis       | 103    | 3.46   | 16.2        |       |      |       |     |              | 1 | 2 |
| Vespertilionidae | Myotis tricolor           | 259    | 13.6   |             |       |      |       |     |              | 1 | 2 |
| Vespertilionidae | Nyctalus noctula          | 364    | 27     | 54.9        | 0.54  | 27.5 | SM-MF | Yes | polygynandry | 1 | 2 |
| Vespertilionidae | Nycticeius sanborni       | 158    | 9.1    | 25.7        |       |      |       |     |              | 1 | 2 |
| Vespertilionidae | Nyctophilus geoffroyi     | 167    | 7.2    | 31.8        | 0.046 | 6.5  |       |     |              | 1 | 2 |
| Vespertilionidae | Nyctophilus gouldi        |        |        |             | 0.217 | 14   |       |     |              | 1 | 2 |
| Vespertilionidae | Nyctophilus timoriensis   | 254    | 10.9   | 47.6        | 0.06  | 13.5 |       |     |              | 1 | 2 |
| Vespertilionidae | Pipistrellus babu         | 97     | 4.8    | 14.2        |       |      |       |     |              | 1 | 2 |
| Vespertilionidae | Pipistrellus ceylonicus   | 182    | 10.1   | 28.3        |       |      |       |     |              | 1 | 2 |
| Vespertilionidae | Pipistrellus circumdatus  | 230    | 10.4   | 35.1        |       |      |       |     |              | 1 | 2 |
| Vespertilionidae | Pipistrellus coromandra   | 105    | 4.6    |             |       |      |       |     |              | 1 | 2 |
| Vespertilionidae | Pipistrellus crassulus    | 132    | 6.1    | 21.3        |       |      |       |     |              | 1 | 2 |
| Vespertilionidae | Pipistrellus dormeri      | 143    | 6.8    | 21.4        |       |      |       |     |              | 1 | 2 |
| Vespertilionidae | Pipistrellus imbricatus   | 137    | 6.3    | 21.2        |       |      |       |     |              | 1 | 2 |
| Vespertilionidae | Pipistrellus javanicus    | 119    | 4.5    | 18.4        |       |      |       |     |              | 1 | 2 |
| Vespertilionidae | Pipistrellus kuhlii       | 166    | 6.3    |             |       |      |       |     |              | 1 | 2 |
| Vespertilionidae | Pipistrellus mimus        | 94     | 3.9    | 14.4        | 0.053 | 3.6  |       |     |              | 1 | 2 |
| Vespertilionidae | Pipistrellus nanus        | 100    | 3.9    | 15.7        | 0.031 | 3.5  | SM-MF | Yes | polygynandry | 1 | 2 |
| Vespertilionidae | Pipistrellus pipistrellus |        |        |             | 0.225 | 5    | SM-MF | Yes | polygynandry | 1 | 2 |

|                  |                          |       |       |      |        |      |       |     |              |  |   |   |
|------------------|--------------------------|-------|-------|------|--------|------|-------|-----|--------------|--|---|---|
| Vespertilionidae | Pipistrellus pulveratus  | 143   | 5.3   | 22.6 |        |      |       |     |              |  | 1 | 2 |
| Vespertilionidae | Pipistrellus rusticus    |       |       |      | 0.31   | 4    |       |     |              |  | 1 | 2 |
| Vespertilionidae | Pipistrellus stenopterus | 244   | 16.1  | 39.4 |        |      |       |     |              |  | 1 | 2 |
| Vespertilionidae | Pipistrellus subflavus   | 125   | 5.3   | 16.6 | 0.0572 | 5    |       |     |              |  | 1 | 2 |
| Vespertilionidae | Pipistrellus tenuis      | 113   | 5.2   | 17.6 |        |      |       |     |              |  | 1 | 2 |
| Vespertilionidae | Plecotus auritus         | 238   | 6.6   |      | 0.044  | 7.2  | MM-MF | Yes | polygynandry |  | 1 | 2 |
| Vespertilionidae | Plecotus rafinesquii     |       |       |      | 0.754  | 9    | MM-MF | Yes | polygynandry |  | 1 | 2 |
| Vespertilionidae | Rhogeessa parvula        | 112   | 4.5   | 18.2 |        |      |       |     |              |  | 1 | 2 |
| Vespertilionidae | Rhogeessa tumida         | 106   | 5.1   |      | 0.077  | 5.1  |       |     |              |  | 1 | 2 |
| Vespertilionidae | Scotomanes ornatus       | 384   | 21.8  | 65   |        |      |       |     |              |  | 1 | 2 |
| Vespertilionidae | Scotophilus borbonicus   |       |       |      | 0.29   | 22   |       |     |              |  | 1 | 2 |
| Vespertilionidae | Scotophilus dinganii     | 437   | 24.3  | 87.2 |        |      |       |     |              |  | 1 | 2 |
| Vespertilionidae | Scotophilus heathi       | 476   | 31.5  | 93.6 | 0.296  | 37.5 |       |     |              |  | 1 | 2 |
| Vespertilionidae | Scotophilus kuhlii       | 348.5 | 19.4  | 66.8 |        |      |       |     |              |  | 1 | 2 |
| Vespertilionidae | Scotophilus nigrata      | 1046  | 101.3 |      |        |      |       |     |              |  | 1 | 2 |
| Vespertilionidae | Tylonycteris pachypus    | 80    | 4.8   | 12.3 | 0.14   | 4.1  | MM-MF | Yes | polygynandry |  | 1 | 2 |
| Vespertilionidae | Tylonycteris robustula   | 115   | 7.2   | 16.7 | 0.2    | 8.4  | MM-MF | Yes | polygynandry |  | 1 | 2 |
| Vespertilionidae | Vespertilio murinus      | 445   | 33.3  |      |        |      |       |     |              |  | 1 | 2 |
